# Supplementary material for: Redox/ultrasound dual stimuli-responsive nanogel for precisely controllable drug release
Source: Royal Society of Chemistry journal article supplement (doi:10.1039/c8nj00392k), 2018-01-01
Supplement: c8nj00392k1.pdf [file c8nj00392k1.pdf]

# Supporting information

## Redox/Ultrasound Dual Stimuli-Responsive Nanogels for Precisely Controllable Drug Release

Nengwei Shen, Bin Lei, Yizhou Wang, Shouhong Xu\*, Honglai Liu\*

Key Laboratory for Advanced Materials, School of Chemistry and Molecular Engineering, East China University of Science and Technology, Shanghai, 200237, PR China.

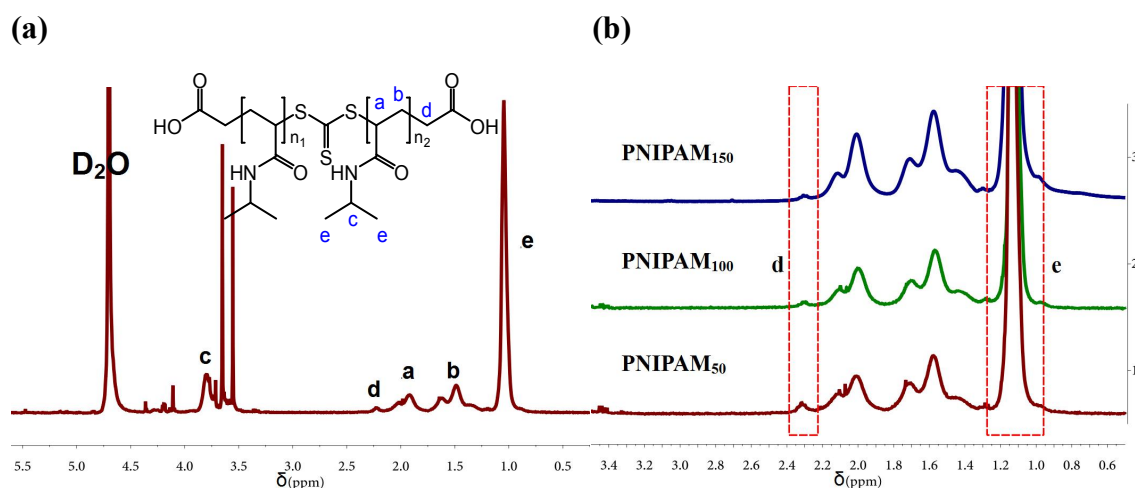

Fig. S1  $^1\text{H}$  NMR of HOOC-PNIPAM<sub>n</sub>-COOH polymers.

A series of HOOC-PNIPAM<sub>n</sub>-COOH polymers were synthesized via the reversible addition-fragmentation chain transfer (RAFT) polymerization and the chemical structure was confirmed by  $^1\text{H}$  NMR spectroscopy. In the  $^1\text{H}$  NMR spectra of HOOC-PNIPAM-COOH polymers (Fig. S1a), the chemical shifts at  $\sim 1.92$  ppm (a) and  $\sim 1.49$  ppm (b) were assigned to methine (-CH) and methylene (-CH<sub>2</sub>) in repeat units, respectively. The chemical shift at  $\sim 3.80$  ppm (c) was assigned to methine (-CH) link to amido. The chemical shift at  $\sim 2.22$  ppm (d) was assigned to methylene (-CH<sub>2</sub>) link to carbonyl group. The chemical shift at  $\sim 1.14$  ppm (e) was assigned to symmetrical two methyls (-CH<sub>3</sub>). The molecular weights ( $M_n$ ) of the PNIPAM were calculated from the ratio of these two integrals and shown in Table S1.

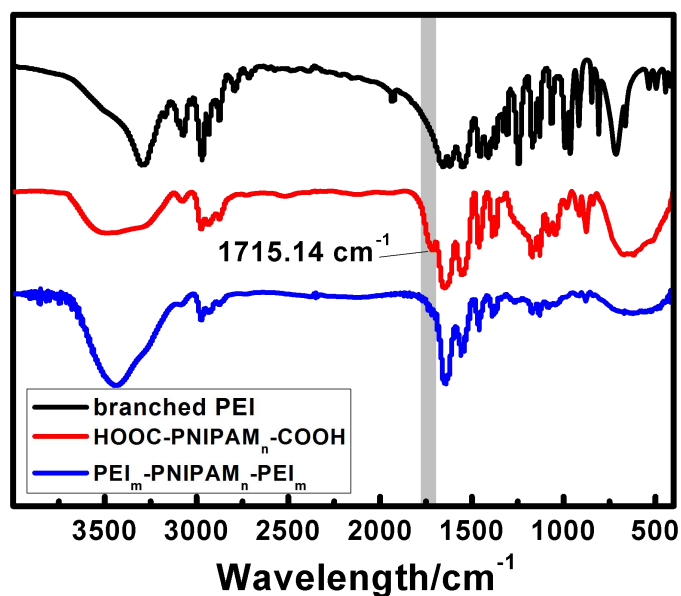

Fig. S2 FTIR spectra of PEI, HOOC-PNIPAM<sub>n</sub>-COOH and PEI<sub>m</sub>-PNIPAM<sub>n</sub>-PEI<sub>m</sub>.

The process of conjugation between HOOC-PNIPAM<sub>n</sub>-COOH and PEI was monitored by FTIR analysis (Fig. S2). The polymerization process was monitored by the FTIR spectrum, which showed a peak at 1715 cm<sup>-1</sup> corresponding to the carboxyl groups of the HOOC-PNIPAM<sub>n</sub>-COOH. And then the observed bond of the carboxyl group disappeared after conjugating PEI, determining successful synthesis of copolymer.

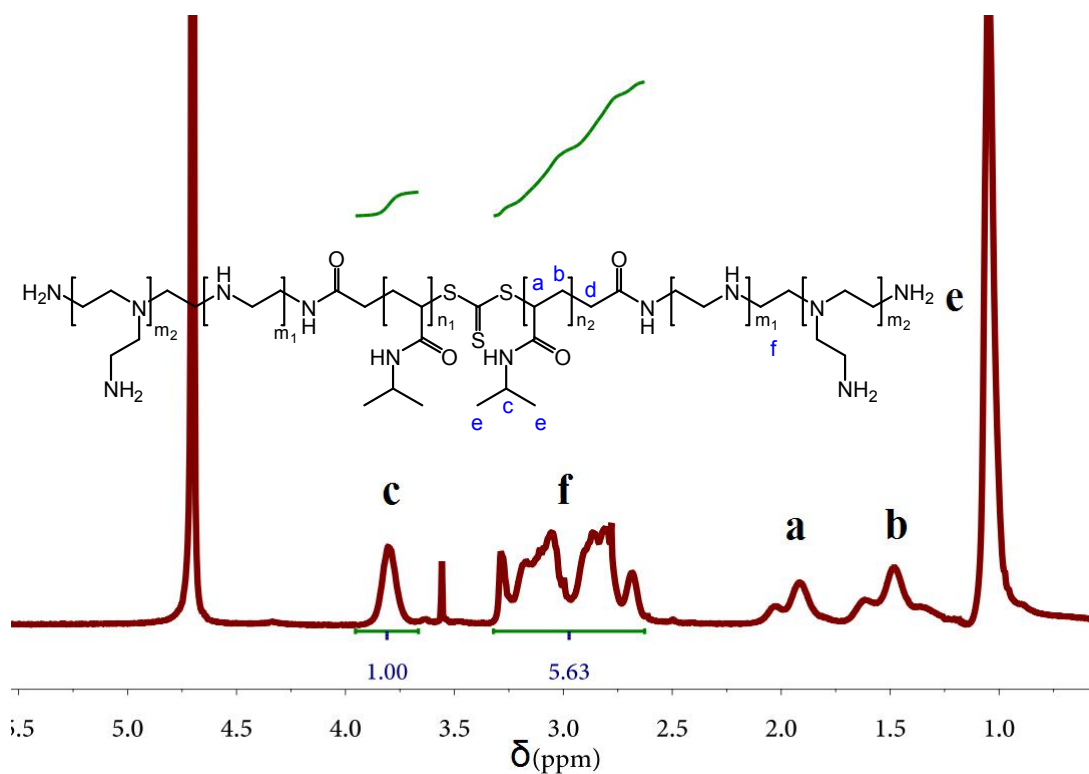

Fig. S3 <sup>1</sup>H NMR of PEI<sub>42</sub>-PNIPAM<sub>100</sub>-PEI<sub>42</sub> copolymer.

In the  $^1\text{H-NMR}$  of  $\text{PEI}_{42}\text{-PNIPAM}_{100}\text{-PEI}_{42}$  (Fig. S3), the chemical shifts at  $\sim 1.92$  ppm (a) and  $\sim 1.49$  ppm (b) were assigned to methine ( $-\text{CH}$ ) and methylene ( $-\text{CH}_2$ ) in repeating units of PNIPAM, respectively. The peak at  $\sim 3.80$  ppm (c) was assigned to methine ( $-\text{CH}$ ) link to amido group of PNIPAM and the signals at  $2.60\sim 3.30$  ppm (f) were attributed to the methylene group in PEI. We have calculated the  $n$  values of PNIPAM block from Fig. S1b and the ratio of PNIPAM: PEI was 62: 86.8, it indicated that 1 molar PNIPAM had been connected with 2.1 molar PEI. The molecular weights ( $M_n$ ) of the polymers calculated from the ratio of these two integrals were shown in Table S1.[1-3]

**Table S1** Properties of polymers.

| Smample                                                         | NIPAM/CTA (or PNIPAM/PEI) |                                | $M_{\text{HNMR}}^a$<br>( $\text{g}\cdot\text{mol}^{-1}$ ) | $M_{\text{GPC}}^b$<br>( $\text{g}\cdot\text{mol}^{-1}$ ) | PD <sup>b</sup> |
|-----------------------------------------------------------------|---------------------------|--------------------------------|-----------------------------------------------------------|----------------------------------------------------------|-----------------|
|                                                                 | In feed (mol/mol)         | Observed(mol/mol) <sup>a</sup> |                                                           |                                                          |                 |
| <b>PNIPAM<sub>50</sub><sup>c</sup></b>                          | 50/1                      | 36/1                           | 4113                                                      | 3653                                                     | 1.43            |
| <b>PNIPAM<sub>100</sub></b>                                     | 100/1                     | 62/1                           | 7051                                                      | 9505                                                     | 1.37            |
| <b>PNIPAM<sub>150</sub></b>                                     | 150/1                     | 107/1                          | 12114                                                     | 16975                                                    | 1.44            |
| <b>PEI<sub>14</sub>-PNIPAM<sub>100</sub>-PEI<sub>14</sub></b>   | 1/3                       | 1/2.2                          | 8349                                                      | -                                                        | -               |
| <b>PEI<sub>42</sub>-PNIPAM<sub>100</sub>-PEI<sub>42</sub></b>   | 1/3                       | 1/2.1                          | 10801                                                     | -                                                        | -               |
| <b>PEI<sub>232</sub>-PNIPAM<sub>100</sub>-PEI<sub>232</sub></b> | 1/3                       | 1/2.0                          | 27029                                                     | -                                                        | -               |
| <b>PEI<sub>42</sub>-PNIPAM<sub>50</sub>-PEI<sub>42</sub></b>    | 1/3                       | 1/2.0                          | 7708                                                      | -                                                        | -               |
| <b>PEI<sub>42</sub>-PNIPAM<sub>150</sub>-PEI<sub>42</sub></b>   | 1/3                       | 1/2.0                          | 15803                                                     | -                                                        | -               |

<sup>a</sup> Determined by  $^1\text{H}$  NMR spectroscopy.

<sup>b</sup> Measured by GPC using DMF as eluent on the basis of polystyrene calibration curve.

<sup>c</sup> The  $n$  (50, 100 and 150) was denoted as the theoretical number of monomers.

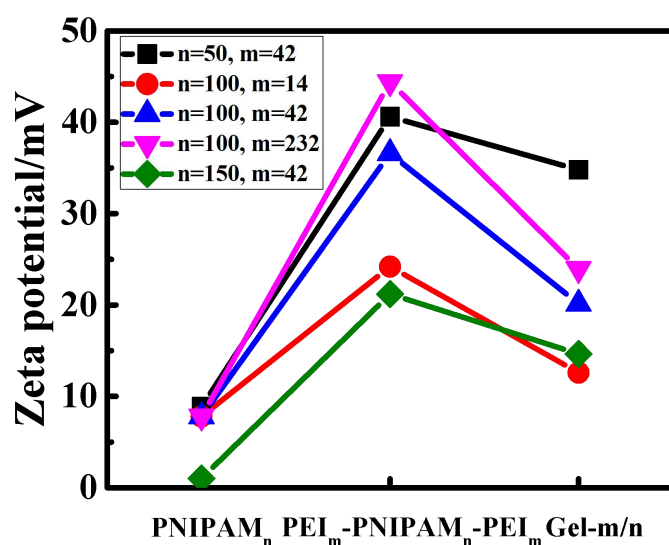

Fig. S4 Zeta potentials of polymers, copolymers and nanogels in aqueous solutions.

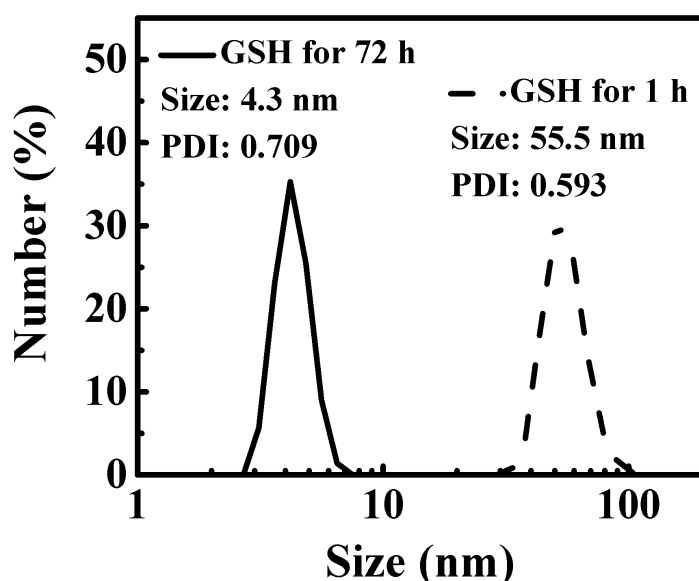

Fig. S5 Reduction-triggered size distribution changes of Gel-42/100 with time. Dashed line: 1hr; Solid line: 72 hrs.

#### References

1. Z. X. Lu, L. T. Liu and X. R. Qi, *International journal of nanomedicine*, 2011, 6, 1661-1673.
2. J. Yang, P. Zhang, L. Tang, P. Sun, W. Liu, P. Sun, A. Zuo and D. Liang, *Biomaterials*, 2010, 31, 144-155.
3. Ş. K. D, T. Gulinsarfraz, G. Hedström, A. Duchanoy, P. Eklund and J. M. Rosenholm,

*Journal of Colloid & Interface Science*, 2014, 418, 300-310.
